# Supplementary material
Source: publisher figshare collection journal article supplement (https://brill.figshare.com/ndownloader/files/34775896)
Supplement: Supplementary file 1 [file 34775896]

**Should I stay or should I go: Escape behaviour of Russell's vipers,  
*Daboia russelii* (Shaw & Nodder, 1797) in India's agricultural  
landscapes**

**Vivek P. Cyriac<sup>1,2,\*</sup>, Kiran B. Srinivasa<sup>3</sup>, Lohith Kumar<sup>2</sup> and Gerard Martin<sup>2</sup>**

<sup>1</sup> Centre for Ecological Sciences, Indian Institute of Science, CV Raman Rd, Bengaluru, Karnataka – 560012,  
India

<sup>2</sup> The Liana Trust, Sy. No. 1418/1419, Rathnapuri, Hunsur, Karnataka – 1571189, India

<sup>3</sup> Humane Society International (India), Hunsur, Karnataka – 1571189, India

\*Corresponding author; e-mail: [vivek.cyriac@gmail.com](mailto:vivek.cyriac@gmail.com)

ORCID iDs: Cyriac: 0000-0002-0465-0452; Srinivasa: 0000-0002-8031-9366; Martin: 0000-0002-1409-2984

**Supplementary material**

**Table S1.**

Definitions used to categorise behaviour and microhabitat usage in Russell's vipers *Daboia russelii*.

|                     | Definition                                                                                                                     |
|---------------------|--------------------------------------------------------------------------------------------------------------------------------|
| <b>Behaviours</b>   |                                                                                                                                |
| Ambush              | Body bunched up, ready to spring, lower jaw usually touching the ground and often in front of the body                         |
| Basking             | The snake is exposed to sun in a location where it is clearly gaining heat from the sun. Body not in tight coils               |
| Courtship           | When the snake is with an individual of the opposite sex during mating season(October, November, December)                     |
| Resting             | Coiled up, usually not exposed to the sun, head placed within the coils                                                        |
| Unknown             | Behaviour of the snake cannot be determined                                                                                    |
| <b>Microhabitat</b> |                                                                                                                                |
| Burrow              | Hole with tunnel, dug by other animals or termite mounds                                                                       |
| Large fallen leaves | Banana leaves, coconut fronds or other palm fronds fallen on the ground or artificially piled up with no sign of decomposition |
| Low vegetation      | Wild or cultivated vegetation up to 0.5 m in height                                                                            |
| High vegetation     | Wild or cultivated vegetation above 0.5 m in height                                                                            |
| Material piles      | Rocks, building material, roofing sheets, etc. piled up. Does not include natural rock formations                              |
| Fire wood           | Branches or wood that has been cut into pieces and piled                                                                       |

**Table S2.**

Summary and comparison of different models from the generalised linear model (GLM) and generalised linear mixed-effects model (GLMM) analyses evaluating escape response and flight initiation distance (FID) in Russell's vipers. Models in bold indicate the best-fit model with the lowest Akaike Information Criterion (AIC) values.

| <b>Model</b>                                                               |                                                                                                  |                       | AIC           | AICc          | $\Delta$ AICc | Akaike weights |
|----------------------------------------------------------------------------|--------------------------------------------------------------------------------------------------|-----------------------|---------------|---------------|---------------|----------------|
| <b>Dependent variable</b>                                                  | <b>Fixed effects</b>                                                                             | <b>Random effects</b> |               |               |               |                |
| <b>Russell's viper escape response (binomial with logit link function)</b> |                                                                                                  |                       |               |               |               |                |
| <b>Moved away</b>                                                          | <b>Behaviour*</b>                                                                                | <b>Individual</b>     | <b>208.15</b> | <b>208.22</b> | <b>0</b>      | <b>0.5494</b>  |
|                                                                            |                                                                                                  | <b>ID + date</b>      | <b>88</b>     | <b>86</b>     |               |                |
| Moved away                                                                 | Behaviour* + snake's visibility + relative humidity                                              | Individual ID + date  | 210.17<br>26  | 210.24<br>32  | 2.0146        | 0.2006         |
| Moved away                                                                 | Behaviour* + snake's visibility + tracker distance + relative humidity                           | Individual ID + date  | 211.46<br>59  | 211.53<br>65  | 3.3079        | 0.1050         |
| Moved away                                                                 | Behaviour* + snake's visibility                                                                  | Individual ID + date  | 212.23<br>44  | 212.30<br>42  | 4.0756        | 0.0715         |
| Moved away                                                                 | Behaviour* + snake's visibility + tracker distance + relative humidity + distance to cover       | Individual ID + date  | 213.10<br>94  | 213.18<br>00  | 4.9514        | 0.0462         |
| Moved away                                                                 | Behaviour* + snake's visibility + tracker distance + relative humidity + distance to cover + sex | Individual ID + date  | 214.89<br>86  | 214.96<br>92  | 6.7406        | 0.0188         |

|                                                                                          |                                                                                                                                                         |                         |              |              |             |        |
|------------------------------------------------------------------------------------------|---------------------------------------------------------------------------------------------------------------------------------------------------------|-------------------------|--------------|--------------|-------------|--------|
| Moved<br>away                                                                            | Behaviour* + snake's<br>visibility + tracker<br>distance + relative<br>humidity + distance to<br>cover + sex + ambient<br>temperature                   | Individual<br>ID + date | 216.85<br>65 | 216.85<br>65 | 8.6985      | 0.0070 |
| Moved<br>away                                                                            | Behaviour* + snake's<br>visibility + tracker<br>distance + relative<br>humidity + distance to<br>cover + sex + ambient<br>temperature +<br>microhabitat | Individual<br>ID + date | 221.39<br>16 | 221.39<br>16 | 13.233<br>6 | 0.0007 |
| Moved<br>away                                                                            | null                                                                                                                                                    | Individual<br>ID + date | 223.07<br>79 | 223.14<br>77 | 14.919<br>1 | 0.0003 |
| <b>Effect of body temperature on escape response (binomial with logit link function)</b> |                                                                                                                                                         |                         |              |              |             |        |
| Moved<br>away                                                                            | Body temperature                                                                                                                                        | Individual<br>ID + date | 182.25<br>46 | 182.34<br>35 | 0           | 0.8126 |
| Moved<br>away                                                                            | Null                                                                                                                                                    | Individual<br>ID + Date | 185.18<br>94 | 185.27<br>83 | 2.9348      | 0.1873 |
| <b>Russell's viper flight initiation distance (FID) (gamma with log link function)</b>   |                                                                                                                                                         |                         |              |              |             |        |
| FID                                                                                      | Snake's visibility +<br>distance to cover*                                                                                                              | Individual<br>ID + date | 188.48<br>27 | 188.66<br>18 | 0           | 0.4489 |
| FID                                                                                      | Snake's visibility +<br>sex +<br>distance to cover* +                                                                                                   | Individual<br>ID + date | 189.48<br>46 | 189.66<br>37 | 1.001       | 0.2720 |
| FID                                                                                      | Snake's visibility +<br>sex +<br>distance to cover* +<br>body temperature                                                                               | Individual<br>ID + date | 191.20<br>61 | 191.38<br>52 | 2.7234      | 0.1150 |

|     |                                                                                                         |                         |              |              |        |        |
|-----|---------------------------------------------------------------------------------------------------------|-------------------------|--------------|--------------|--------|--------|
| FID | Snake's visibility* +<br>sex + behaviour +<br>distance to cover* +<br>body temperature                  | Individual<br>ID + date | 191.28<br>28 | 191.46<br>19 | 2.8001 | 0.1106 |
| FID | Distance to cover*                                                                                      | Individual<br>ID + date | 193.19<br>08 | 193.37<br>00 | 4.7082 | 0.0426 |
| FID | Null                                                                                                    | Individual<br>ID + date | 196.95<br>59 | 197.13<br>50 | 8.4732 | 0.0064 |
| FID | Snake's visibility +<br>sex + behaviour +<br>microhabitat +<br>distance to cover* +<br>body temperature | Individual<br>ID + date | 197.80<br>37 | 197.98<br>28 | 9.3210 | 0.0042 |

---

**Table S3.**

Results of the pairwise comparison evaluating escape response across behaviours (A, Ambush; B, basking; C, courtship; R, resting) and flight initiation distance (FID) across snake's visibility (NV, not visible; SC, small coils visible; under half visible; UH, MH, more than half visible; CP, completely visible) using Tukey's *post-hoc* test. Models in bold indicate the significant pair-wise combinations.

| Pair of groups                                               | Estimate        | Std. error     | z value       | P value       |
|--------------------------------------------------------------|-----------------|----------------|---------------|---------------|
| <b>Escape response across behaviours</b>                     |                 |                |               |               |
| B–A                                                          | 1.6851          | 0.7375         | 2.285         | 0.0903        |
| C–A                                                          | 2.9369          | 1.4034         | 2.093         | 0.1403        |
| R–A                                                          | 0.1886          | 0.8013         | 0.235         | 0.9949        |
| C–B                                                          | 1.2518          | 1.2664         | 0.989         | 0.7378        |
| <b>R–B</b>                                                   | <b>–1.4965</b>  | <b>0.4930</b>  | <b>–3.035</b> | <b>0.0112</b> |
| R–C                                                          | –2.7484         | 1.3336         | –2.061        | 0.1503        |
| <b>FID across different levels of the snake's visibility</b> |                 |                |               |               |
| MH–CP                                                        | 0.47350         | 0.29022        | 1.632         | 0.4708        |
| NV–CP                                                        | –0.37074        | 0.26544        | –1.397        | 0.6238        |
| SC–CP                                                        | –0.02365        | 0.27019        | –0.088        | 1.0000        |
| UH–CP                                                        | 0.28868         | 0.28244        | 1.022         | 0.8417        |
| <b>NV–MH</b>                                                 | <b>–0.84424</b> | <b>0.26090</b> | <b>–3.236</b> | <b>0.0104</b> |
| SC–MH                                                        | –0.49715        | 0.23374        | –2.127        | 0.2047        |
| UH–MH                                                        | –0.18482        | 0.23001        | –0.804        | 0.9278        |
| SC–NV                                                        | 0.34709         | 0.20483        | 1.695         | 0.4310        |
| <b>UH–NV</b>                                                 | <b>0.65942</b>  | <b>0.21570</b> | <b>3.057</b>  | <b>0.0184</b> |
| UH–SC                                                        | 0.31233         | 0.21131        | 1.478         | 0.5705        |
